# Supplementary material for: Suppression of Th2 and Tfh immune reactions by Nr4a receptors in mature T reg cells
Source: PubMed Central journal article supplement — J Exp Med. 2015 Sep 21;212(10):1623–40. doi: 10.1084/jem.20142088 (PMC4577835; doi:10.1084/jem.20142088), 2015-09-21
Supplement: supp_jem.20142088_JEM_20142088_sm.pdf [file supp_jem.20142088_JEM_20142088_sm.pdf]

SUPPLEMENTAL MATERIAL

Sekiya et al., <http://www.jem.org/cgi/content/full/jem.20142088/DC1>

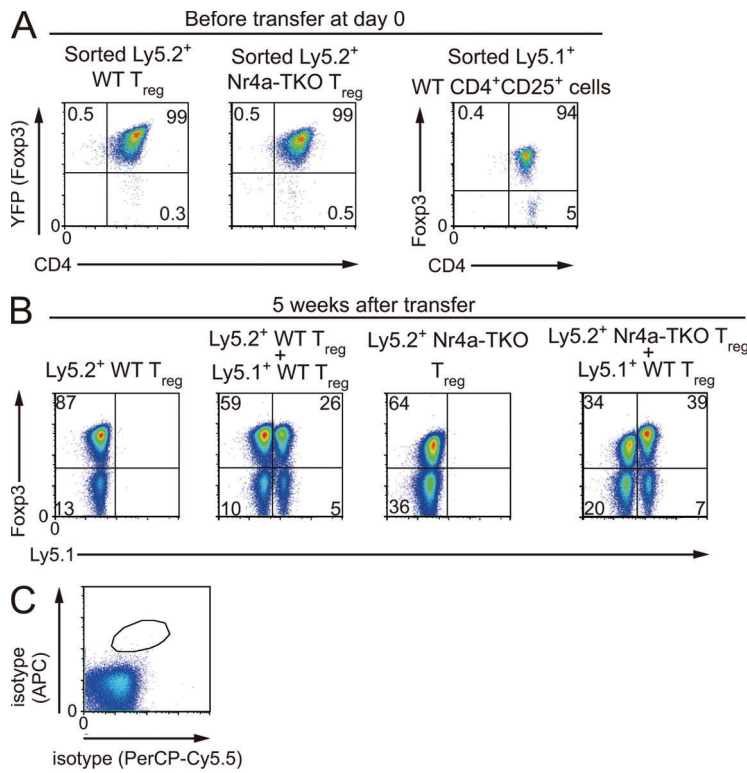

**Figure S1. Sorted T reg cells before and after adoptive transfer into CD3 $\epsilon$ -deficient recipient mice.** (A) Flow cytometry profiles of T reg cells sorted from Ly5.2<sup>+</sup>Rosa26<sup>RFP</sup>Foxp3<sup>YFP-Cre</sup>-WT mice, Ly5.2<sup>+</sup>Rosa26<sup>RFP</sup>Foxp3<sup>YFP-Cre</sup>-Nr4a-TKO mice, and Ly5.1<sup>+</sup> wild-type mice, before transfer into CD3 $\epsilon$ -deficient recipient mice. (B) Flow cytometry profiles of transferred T reg cells 5 wk after transfer into CD3 $\epsilon$ -deficient mice. Numbers in the outlined area indicate the percentage of cells in each. (C) Flow cytometry profiles of Ly5.1<sup>+</sup>CD4<sup>+</sup> T cells in CD3 $\epsilon$ -deficient recipient mice of Ly5.1<sup>+</sup> WT T reg and Ly5.2<sup>+</sup> WT T reg cells, stained with isotype control antibodies. The indicated area corresponds to the definition of the T<sub>H</sub> cell population in Fig. 10 A.

**Table S1.** Primer sequences used in ChIP-qPCR analysis

| Locus          | Top                          | Bottom                       |
|----------------|------------------------------|------------------------------|
| Foxp3 promoter | 5'-ACCTTTACCTCTGTGGTGAG-3'   | 5'-GTAGTTTTTTTTCTTTGCTCTC-3' |
| Ikzf4 promoter | 5'-TCCCACCTCTCCACTGTCTTG-3'  | 5'-GGGAGGCGTGGATGCGCTTGG-3'  |
| Il4 promoter   | 5'-TCCTATGCTGAAACTTTGTAG-3'  | 5'-TATTCTGGGCAATCAGCACC-3'   |
| Il4 HSI1       | 5'-GCCTTGCTGATACGGTATCT-3'   | 5'-GCCTGTAGGGACCATACGA-3'    |
| Il21 -1200     | 5'-CCTAACTATGGCCTAAGCATC-3'  | 5'-CACTGGGTCTGAGCAGCATGC-3'  |
| Gzmn region1   | 5'-CATCCTTCAGCTGGCTCACTG-3'  | 5'-CTGGAGAGCTGGCCCCAGACAG-3' |
| Gzmn region2   | 5'-AAGATCTAATCATGGTCCTTG-3'  | 5'-ATTATATCTGGGGAAAGAGC-3'   |
| Spp1 region1   | 5'-CATACAGTCGGCCTTAAGG-3'    | 5'-CCAGGACTCCTTTTCATTC-3'    |
| Spp1 region2   | 5'-TGA CTGATTCTGGCAGCTCAG-3' | 5'-TGCTGTTCTAGCAACCTTTG-3'   |
| Gapdh region1  | 5'-CCTAGCCTGGGCGGGCAGCTC-3'  | 5'-CTCCTGAGTTTACCTGATGAAC-3' |

**Table S2.** Primer sequences used in bisulfite sequencing

| Locus        | Top                        | Bottom                       |
|--------------|----------------------------|------------------------------|
| Foxp3 (CNS2) | 5'-ATTGAATGGATATGGTTTGT-3' | 5'-AACCTTAAACCCCTCTAACATC-3' |
